# Supplementary material for: Cellulose Isolation Methodology for NMR Analysis of Cellulose Ultrastructure
Source: Materials (Basel). 2011 Nov 7;4(11):1985–2002. doi: 10.3390/ma4111985 (PMC5448851; doi:10.3390/ma4111985)
Supplement: Supplementary File 1 [file materials-04-01985-s001.pdf]

## Supplementary Information

**Table S1.** Non-linear line-fit parameters of the  $^{13}\text{C}$  CP/MAS spectra of untreated microcrystalline cellulose (MCC).

| Assignment                | $^{13}\text{C}$ Chemical Shift | % Area | FWHM (Hz) |
|---------------------------|--------------------------------|--------|-----------|
| $\text{I}_\alpha$         | 89.4                           | 7.9    | 111       |
| $\text{I}_{\alpha+\beta}$ | 88.7                           | 10.6   | 100       |
| <i>Para</i> -cystalline   | 88.2                           | 35.3   | 170       |
| $\text{I}_\beta$          | 87.4                           | 8.2    | 123       |

**Table S2.** Non-linear line-fit parameters of the  $^{13}\text{C}$  CP/MAS spectra of untreated cellulose from cotton swaps.

| Assignment                | $^{13}\text{C}$ Chemical Shift | % Area | FWHM (Hz) |
|---------------------------|--------------------------------|--------|-----------|
| $\text{I}_\alpha$         | 90.5                           | 9.0    | 205       |
| $\text{I}_{\alpha+\beta}$ | 89.6                           | 9.2    | 181       |
| <i>Para</i> -cystalline   | 88.5                           | 34.5   | 250       |
| $\text{I}_\beta$          | 87.7                           | 9.3    | 235       |
